# Supplementary material for: A facile and general fabrication method for organic silica hollow spheres and their excellent adsorption properties for heavy metal ions
Source: Royal Society of Chemistry journal article supplement (doi:10.1039/c4ta03856h), 2014-10-24
Supplement: c4ta03856h1.pdf [file c4ta03856h1.pdf]

Electronic Supplementary Information

# A Facile and General Fabrication Method of Organic Silica Hollow Spheres and Their Excellent Adsorptions for Heavy Metal Ions

Jing Hu<sup>a,b</sup>, Xuge Wang<sup>a</sup>, Liqin Liu<sup>a</sup>, Limin Wu<sup>b\*</sup>

5

**Table S1** BET surface area and pore volume of vinyl silica particles with different morphologies

| VTMS/TEOS | Morphology               | $S_{\text{BET}}^a$<br>( $\text{m}^2\text{g}^{-1}$ ) | $S_{\text{micro}}^b$<br>( $\text{m}^2\text{g}^{-1}$ ) | $S_{\text{meso}}^c$<br>( $\text{m}^2\text{g}^{-1}$ ) | $V_{\text{T}}^d$<br>( $\text{cm}^3\text{g}^{-1}$ ) | $V_{\text{micro}}^e$<br>( $\text{cm}^3\text{g}^{-1}$ ) | $V_{\text{meso}}^f$<br>( $\text{cm}^3\text{g}^{-1}$ ) |
|-----------|--------------------------|-----------------------------------------------------|-------------------------------------------------------|------------------------------------------------------|----------------------------------------------------|--------------------------------------------------------|-------------------------------------------------------|
| 1:5       | Hollow sphere            | 259.9                                               | 75.3                                                  | 184.6                                                | 0.355                                              | 0.031                                                  | 0.324                                                 |
| 1:1       | Bowl-like particle       | 55.1                                                | 5.60                                                  | 49.5                                                 | 0.205                                              | 0.002                                                  | 0.203                                                 |
| 1.2:0     | Spherical solid particle | 8.75                                                | —                                                     | —                                                    | —                                                  | —                                                      | —                                                     |

<sup>a</sup> BET surface area, <sup>b</sup> Micropore area, <sup>c</sup> Mesopore area, <sup>d</sup> Total pore volume, <sup>e</sup> Micropore volume, <sup>f</sup> Mesopore volume. Micropores were determined by a *t*-plot method. Mesopores were determined by the BJH method (desorption branch).

10

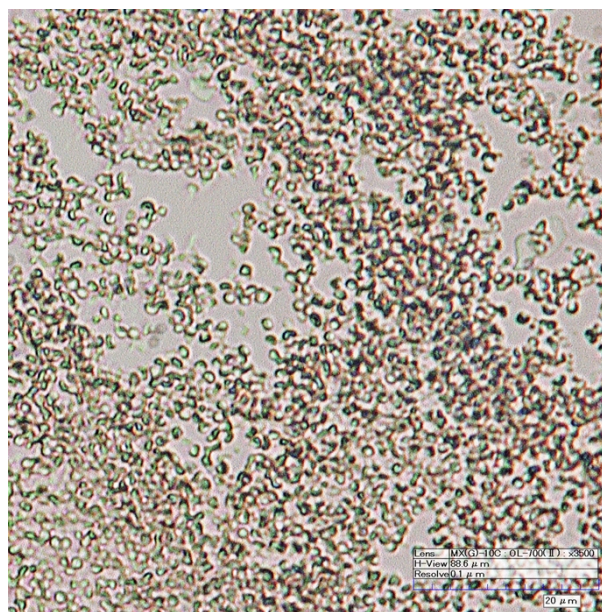

**Fig. S1** Optical microscopy of the vinyl silica bowl-like particles (Run 3 in Table 1)

15

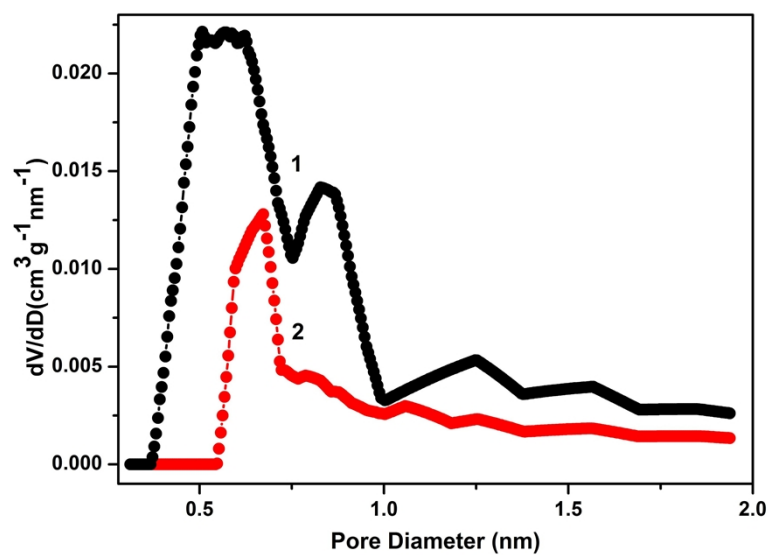

**Fig. S2** Micropore size distribution of vinyl silica hollow spheres (1) and vinyl silica bowl-like particles (2), corresponding to Runs 1 and 2 in Table 1.

5

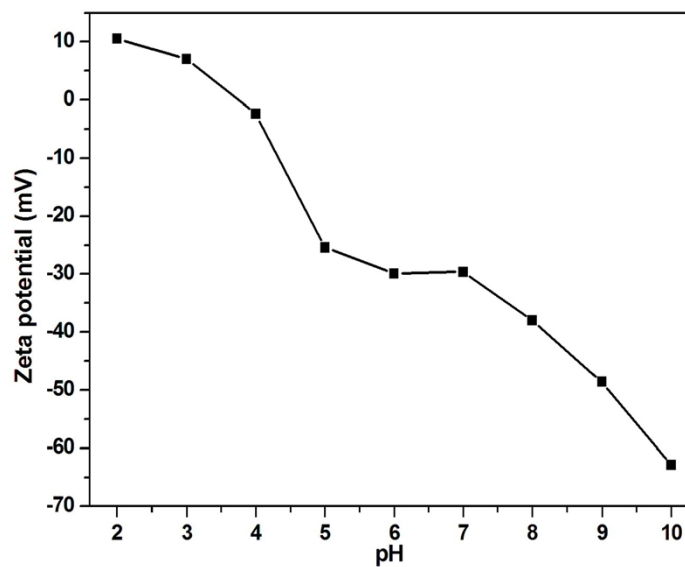

10 **Fig. S3** Zeta potential of the vinyl silica hollow spheres at different pH

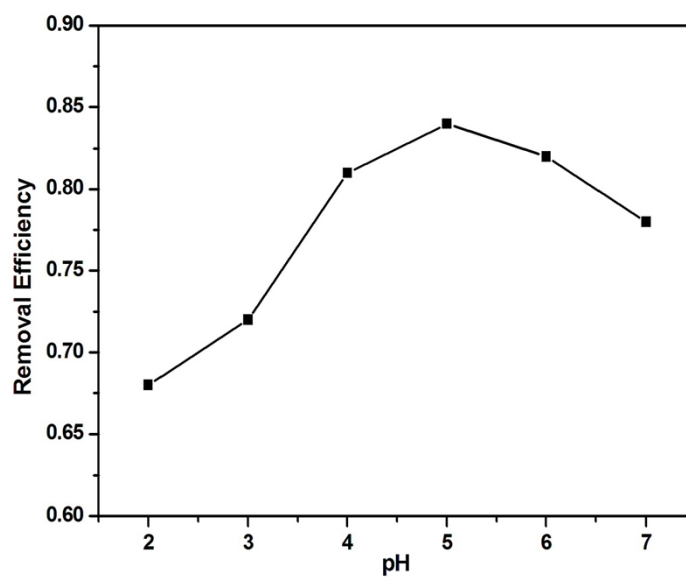

**Fig. S4** Effect of initial pH on the removal of  $\text{Pb}^{2+}$  ion by vinyl silica hollow spheres. The content of vinyl silica hollow spheres was 0.025g and the initial  $\text{Pb}^{2+}$  ion concentration was  $100 \text{ mg}\cdot\text{L}^{-1}$ .

5  
10  
15  
20
